# Supplementary material for: Mortality Trends After Transfer From Peritoneal Dialysis to Hemodialysis
Source: PubMed Central journal article supplement — Kidney Int Rep. 2022 Mar 4;7(5):1062–73. doi: 10.1016/j.ekir.2022.02.016 (PMC9091783; doi:10.1016/j.ekir.2022.02.016), 2022-03-04
Supplement: mmc1.pdf [file mmc1.pdf]

## Supplements

### Annexe 1. Cause-specific death categories

#### Cardiovascular:

Myocardial Infarction  
Hyperkalemia  
Pericarditis  
Cardiac Tamponade  
Atherosclerotic Heart Disease  
Cardiomyopathy  
Cardiac Arrhythmia  
Cardiac Arrest  
Valvular Heart Disease  
Pulmonary Edema  
Congestive heart failure  
Pulmonary Embolus  
Cerebrovascular Accident  
Intracranial Hemorrhage  
Ischemic Brain Damage  
Anoxic Encephalopathy

#### Infection:

Septicemia due to vascular access  
Peritoneal access infectious complication  
Peritonitis  
Central nervous system infection  
Septicemia, Due To Peritonitis  
Septicemia, Due To Peripheral Vascular Disease  
Gangrene  
Septicemia  
Pulmonary Infection  
CMV  
Tuberculosis  
Cardiac infection (endocarditis)  
Abdominal infection  
Hepatitis B  
Hepatitis C  
Other Viral Hepatitis  
Genito-urinary infection  
Viral Infection, Other  
Infection, Other

#### Social

Withdrawal from dialysis/uremia  
Suicide  
Drug Overdose (Street Drugs)  
Accident Unrelated To Treatment

#### Other

Liver-Drug Toxicity  
Cirrhosis  
Polycystic Liver Disease  
Liver Failure  
Perforation of Peptic Ulcer  
Perforation of Bowel  
Hypokalemia  
Hypernatremia  
Hyponatremia  
Bone Marrow Depression  
Cachexia  
Malignant Disease  
Aids  
Dementia  
Seizures  
Chronic Obstructive Lung Disease  
Complications Of Surgery  
Air Embolism  
Acidosis  
Adrenal insufficiency  
Gastro-Intestinal Hemorrhage  
Pancreatitis  
Hemorrhage from Vascular Access  
Hemorrhage from Dialysis Circuit  
Mesenteric Infarction/Ischemic Bowel  
Other Hemorrhage  
Hypoglycemia  
Hyperglycemia  
Diabetic coma  
Hyperthyroidism  
Hypothyroidism

#### Unknown

Unknown

Table S1. Baseline characteristics of incident PD patients transferred to HD who did or did not resume PD within 180 days of transfer to HD.

| Characteristics          | ANZDATA            |                        | CORR              |                        | ERA Registry       |                          |
|--------------------------|--------------------|------------------------|-------------------|------------------------|--------------------|--------------------------|
|                          | Resumed PD, n=1300 | Remained on HD, n=5383 | Resumed PD, n=932 | Remained on HD, n=4915 | Resumed PD, n=3971 | Remained on HD, n=17,603 |
| Age at KRT start (years) | 61 [50-70]         | 50 [49-70]             | 61 [50-71]        | 63 [51-72]             | 60 [48-69]         | 61 [49-71]               |
| Male                     | 732 (56%)          | 3146 (58%)             | 527 (59%)         | 2926 (60%)             | 2582 (65%)         | 11232 (64%)              |
| Primary kidney disease   |                    |                        |                   |                        |                    |                          |
| Glomerulonephritis       | 365 (28%)          | 1356 (25%)             | 193 (21%)         | 909 (19%)              | 648 (16)           | 2707 (15%)               |
| Diabetic nephropathy     | 425 (32%)          | 1971 (37%)             | 343 (38%)         | 1969 (41%)             | 835 (21)           | 4332 (25%)               |
| Hypertensive disease     | 183 (14%)          | 707 (13%)              | 141 (16%)         | 882 (18%)              | 521 (13)           | 2649 (15%)               |
| Other                    | 326 (25%)          | 1336 (25%)             | 222 (25%)         | 1019 (21%)             | 1967 (49)          | 7915 (45%)               |
| Year of KRT start        |                    |                        |                   |                        |                    |                          |
| 2000-2004                | 414 (32%)          | 1859 (35%)             | 313 (36%)         | 1912 (39%)             | 1272 (32)          | 5916 (34%)               |
| 2005-2009                | 536 (41%)          | 2051 (38%)             | 395 (42%)         | 2010 (41%)             | 1522 (38)          | 6550 (37%)               |
| 2010-2014                | 350 (27%)          | 1473 (27%)             | 224 (24%)         | 994 (20%)              | 1177 (30)          | 5137 (29%)               |
| PD vintage (years)       | 1.3 [0.7-2.3]      | 1.4 [0.6-2.7]          | 1.4 [0.7-2.6]     | 1.4 [0.5-2.7]          | 0.9 (0.3-1.9)      | 1.2 [0.5-2.5]            |
| Days on temporary HD     | 59 [36-99]         | -                      | 57 [35-94]        | -                      | 49 [26-83]         | -                        |

Data unavailable in USRDS dataset used for analysis. Data represent number (%) or median [IQR]

Abbreviation: KRT, kidney replacement therapy

**Table S2.** Crude mortality rates per 100 patient-years.

|                                 | <b>0-30 d</b>    | <b>31-60 d</b>   | <b>61-90 d</b>   | <b>91-120 d</b>  | <b>121-150 d</b> | <b>151-180 d</b> |
|---------------------------------|------------------|------------------|------------------|------------------|------------------|------------------|
| <b>ANZDATA</b>                  |                  |                  |                  |                  |                  |                  |
| 2000-2004                       | 54.2             | 40.5             | 25.4             | 19.2             | 27.7             | 22.1             |
| 2005-2009                       | 50.1             | 30.5             | 22.0             | 16.2             | 18.7             | 22.4             |
| 2010-2014                       | 35.7             | 23.0             | 12.7             | 19.1             | 4.0              | 9.2              |
| <i>p-value</i><br>(between era) | <i>0.04</i>      | <i>0.03</i>      | <i>0.05</i>      | <i>0.74</i>      | <i>&lt;0.001</i> | <i>0.01</i>      |
| <b>all</b>                      | <b>47.6</b>      | <b>31.9</b>      | <b>20.6</b>      | <b>18.0</b>      | <b>17.8</b>      | <b>18.5</b>      |
| <b>CORR</b>                     |                  |                  |                  |                  |                  |                  |
| 2000-2004                       | 76.8             | 36.8             | 30.1             | 27.8             | 24.7             | 22.6             |
| 2005-2009                       | 64.9             | 32.2             | 20.8             | 13.9             | 18.4             | 18.8             |
| 2010-2013                       | 58.1             | 24.3             | 26.2             | 21.2             | 7.0              | 13.2             |
| <i>p-value</i><br>(between era) | <i>0.21</i>      | <i>0.26</i>      | <i>0.24</i>      | <i>0.03</i>      | <i>0.03</i>      | <i>0.35</i>      |
| <b>all</b>                      | <b>67.7</b>      | <b>32.4</b>      | <b>25.4</b>      | <b>20.7</b>      | <b>18.8</b>      | <b>19.3</b>      |
| <b>ERA Registry</b>             |                  |                  |                  |                  |                  |                  |
| 2000-2004                       | 41.6             | 37.4             | 34.7             | 26.0             | 23.2             | 19.3             |
| 2005-2009                       | 30.0             | 32.4             | 26.0             | 21.0             | 14.2             | 16.7             |
| 2010-2014                       | 23.4             | 22.8             | 19.9             | 13.0             | 13.5             | 15.7             |
| <i>p-value</i><br>(between era) | <i>&lt;0.001</i> | <i>&lt;0.001</i> | <i>&lt;0.001</i> | <i>&lt;0.001</i> | <i>&lt;0.001</i> | <i>0.372</i>     |
| <b>all</b>                      | <b>32.0</b>      | <b>31.4</b>      | <b>27.2</b>      | <b>20.4</b>      | <b>17.0</b>      | <b>17.4</b>      |
| <b>USRDS</b>                    |                  |                  |                  |                  |                  |                  |
| 2000-2004                       | 39.5             | 39.3             | 33.0             | 27.4             | 26.0             | 24.6             |
| 2005-2009                       | 34.8             | 33.0             | 28.5             | 25.0             | 23.6             | 22.0             |
| 2010-2014                       | 29.2             | 30.0             | 26.4             | 22.0             | 20.3             | 19.8             |
| <b>all</b>                      | <b>34.5</b>      | <b>34.1</b>      | <b>29.3</b>      | <b>25.0</b>      | <b>23.3</b>      | <b>22.2</b>      |

**Table S3.** Adjusted hazard ratios for mortality, and their 95% confidence intervals in ANZDATA during early, medium and late periods, with adjustment for cause of transfer, age, sex, primary kidney disease, year of kidney replacement therapy initiation and PD duration before transfer to HD.

| Variable                                         | HR (95% CI)      | p-value | HR (95% CI)      | p-value | HR (95% CI)        | p-value |
|--------------------------------------------------|------------------|---------|------------------|---------|--------------------|---------|
|                                                  | <90 days         |         | 90-180 days      |         | >180 days          |         |
| <b>Age , ref. &lt;50 years</b>                   |                  |         |                  |         |                    |         |
| 50-59                                            | 2.01 (1.40-2.87) | <0.001  | 1.24 (0.80-1.92) | 0.33    | 1.57 (1.37-1.79)   | <0.001  |
| 60-69                                            | 2.86 (2.05-3.98) | <0.001  | 1.79 (1.21-2.64) | 0.004   | 2.00 (1.76-2.27)   | <0.001  |
| ≥70                                              | 4.70 (3.41-6.49) | <0.001  | 2.51 (1.71-3.69) | <0.001  | 2.92 (2.57-3.31)   | <0.001  |
| <b>Sex, ref. Female</b>                          |                  |         |                  |         |                    |         |
| Male                                             | 0.80 (0.67-0.96) | 0.01    | 0.73 (1.71-3.69) | 0.01    | 1.05 (0.9701-1.13) | 0.27    |
| <b>Primary Kidney Disease, ref. Diabetes</b>     |                  |         |                  |         |                    |         |
| GN                                               | 0.70 (0.54-0.90) | 0.005   | 0.51 (0.35-0.72) | <0.001  | 0.58 (0.52-0.65)   | <0.001  |
| Hypertensive                                     | 0.99 (0.76-1.29) | 0.95    | 0.88 (0.62-1.26) | 0.49    | 0.76 (0.68-0.86)   | <0.001  |
| Other                                            | 0.92 (0.74-1.16) | 0.51    | 0.53 (0.38-0.75) | <0.001  | 0.64 (0.58-0.72)   | <0.001  |
| <b>Year, ref. 2000-2004</b>                      |                  |         |                  |         |                    |         |
| 2005-2009                                        | 0.92 (0.76-1.11) | 0.38    | 0.85 (0.65-1.11) | 0.22    | 0.82 (0.75-0.89)   | <0.001  |
| 2010-2014                                        | 0.68 (0.53-0.88) | 0.003   | 0.46 (0.32-0.67) | <0.001  | 0.80 (0.69-0.91)   | 0.001   |
| <b>PD vintage, ref. &lt;6 mths</b>               |                  |         |                  |         |                    |         |
| 6 mths - 3 yrs                                   | 1.16 (0.91-1.47) | 0.22    | 1.25 (0.91-1.73) | 0.17    | 1.14 (1.04-1.26)   | 0.007   |
| ≥ 3 years                                        | 1.91 (1.47-2.49) | <0.001  | 1.58 (1.08-2.31) | 0.02    | 1.32 (0.69-0.91)   | 0.001   |
| <b>Cause of transfer, ref. Infection, n=2963</b> |                  |         |                  |         |                    |         |
| UF/clearance, n=1174                             | 0.66 (0.50-0.88) | 0.004   | 0.94 (0.65-1.37) | 0.75    | 0.91 (0.81-1.02)   | 0.11    |
| Mechanical, n=1010                               | 0.37 (0.25-0.53) | <0.001  | 0.69 (0.44-1.07) | 0.10    | 0.81 (0.72-0.91)   | <0.001  |
| Social, n=829                                    | 1.01 (0.78-1.30) | 0.93    | 1.78 (1.27-2.47) | 0.001   | 1.14 (1.00-1.28)   | 0.04    |
| Other, n=633                                     | 1.06 (0.79-1.43) | 0.68    | 1.01 (0.62-1.62) | 0.98    | 0.99 (0.85-1.15)   | 0.87    |

\*ANZDATA only, GN: glomerulonephritis, HD: hemodialysis, mths: months, PD: peritoneal dialysis, ref: reference category, UF: ultrafiltration

**Figure S1.** Crude rates of transfer to HD ( $\geq 1$  day) and mortality in all incident PD patients in each registry per 100 patient-years, by cohort year of kidney replacement therapy initiation.

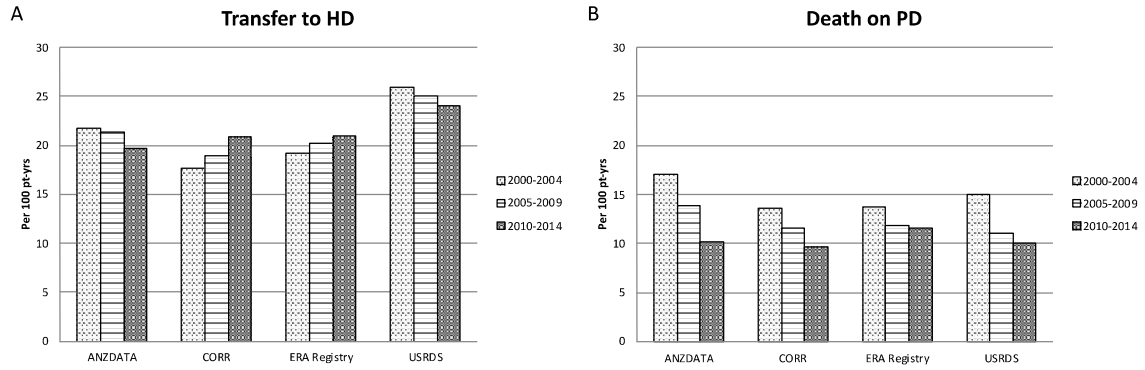

**Figure S2.** Cause of death after transfer from PD to HD, by 30-day period in (A) ANZDATA, (B) CORR, and (C), ERA REGISTRY. Data unavailable in USRDS cohort.

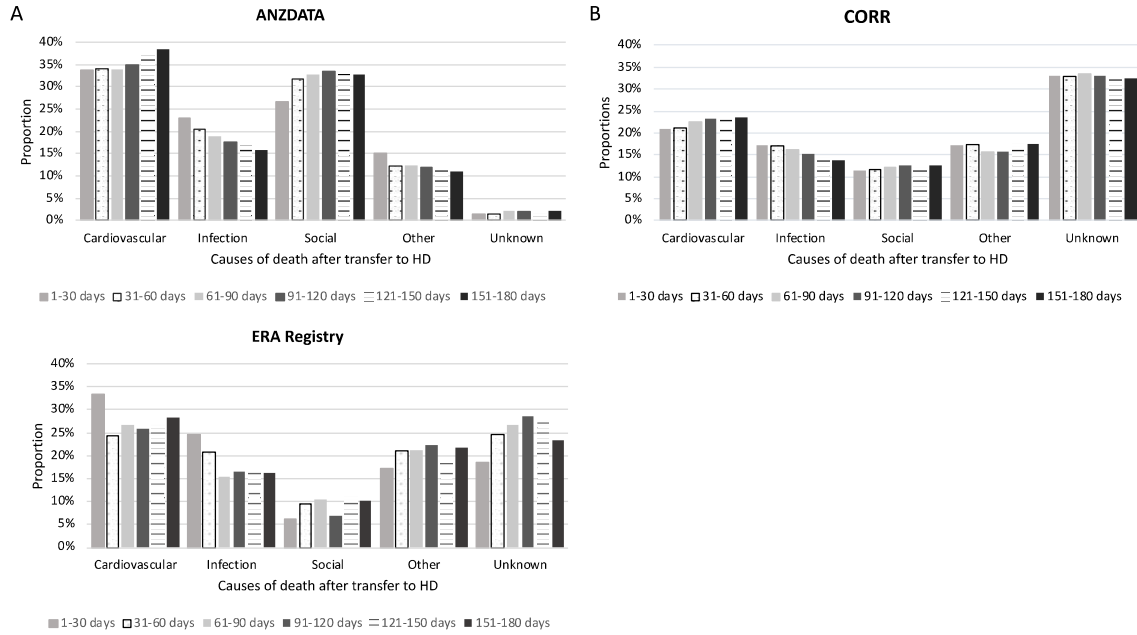

**Figure S3.** Forest Plots of the adjusted hazard ratios for mortality after transfer from PD to HD, stratified by early (<90d), medium (90-180d) and late (>180d) period in (A) ANZDATA, (B) CORR, (C), ERA REGISTRY and (D) USRDS. Adjusted for age, sex, primary kidney disease, year of kidney replacement therapy initiation and PD duration before transfer to HD.

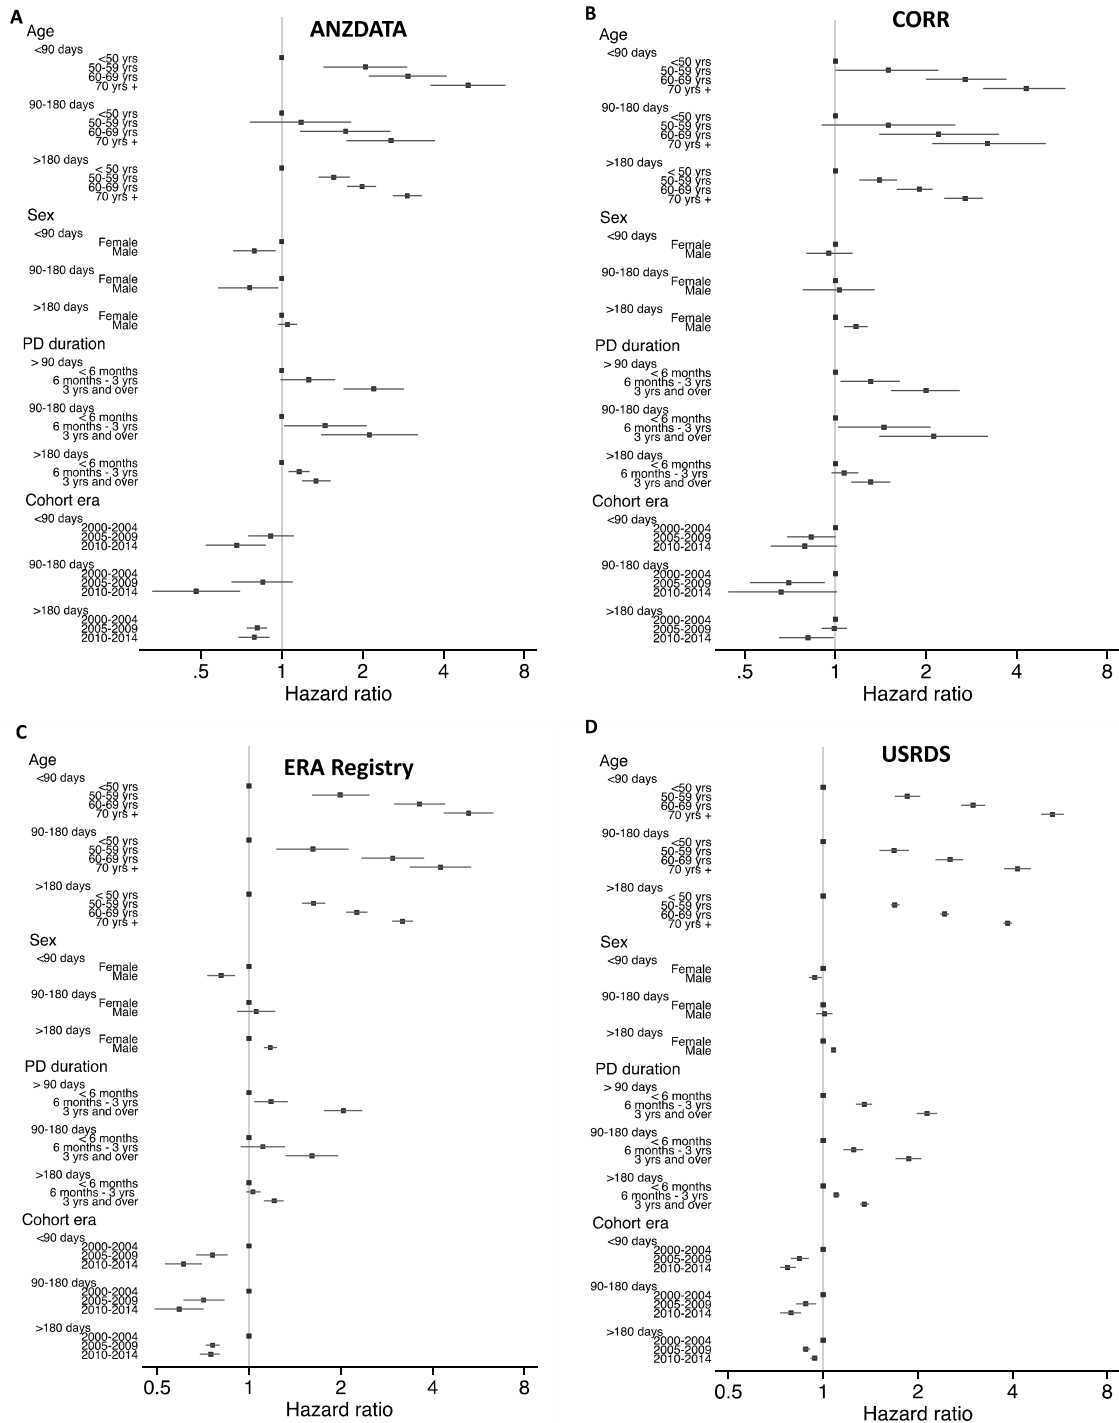

**Figure S4** Adjusted survival curves for the initial 90 days after transfer from PD to HD in A) ANZDATA, B) CORR and C) ERA REGISTRY. Data adjusted for male sex, diabetic nephropathy, PD vintage > 3 years, era 2010-2014 and age as displayed ( $\geq 70$  years versus 50-59 years).

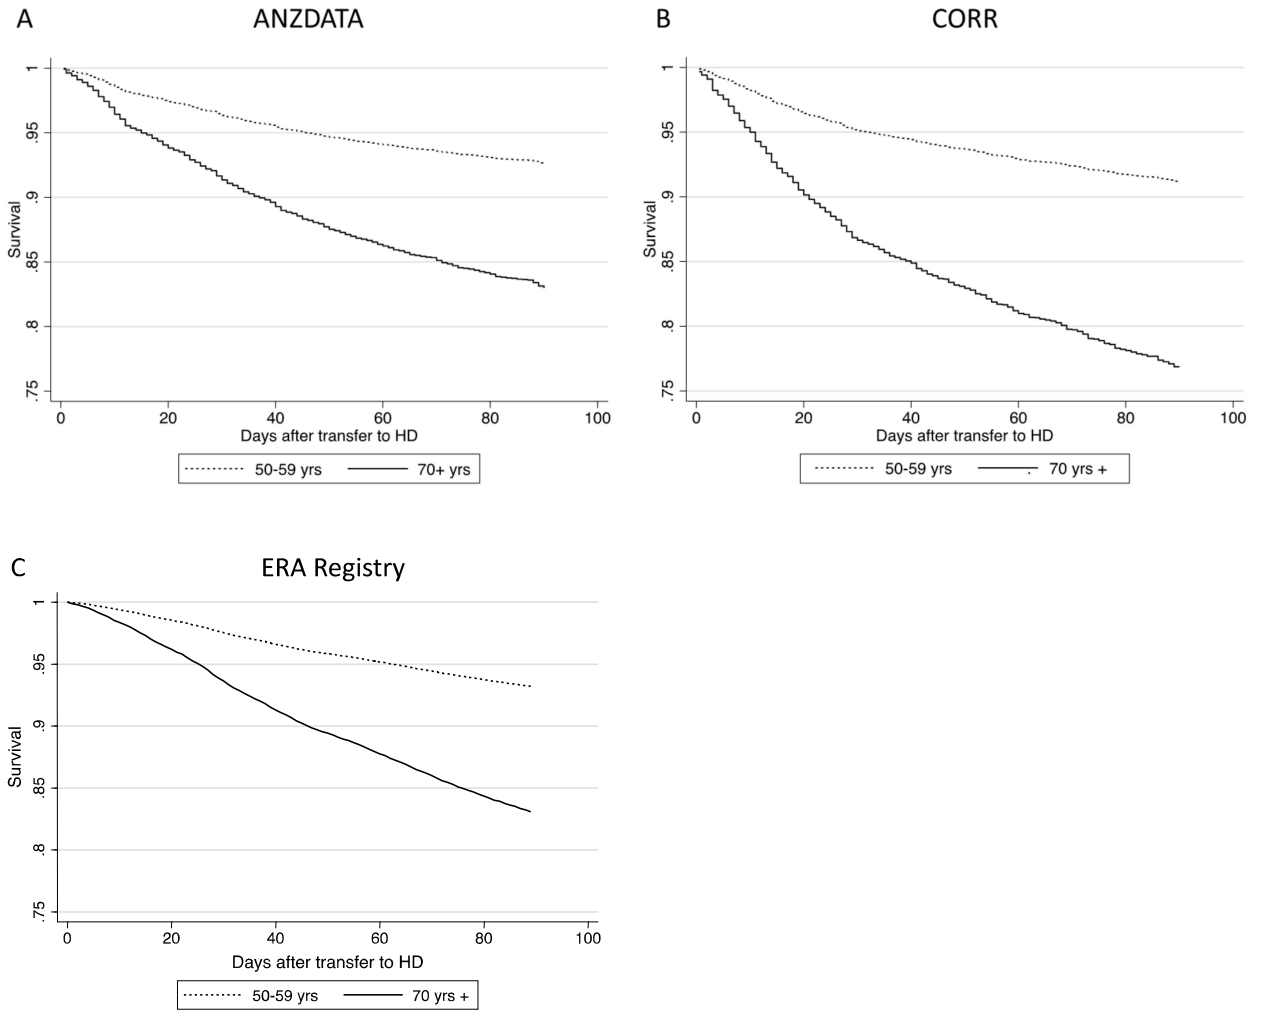



STROBE Statement—Checklist of items that should be included in reports of *cohort studies*

|                              | Item No | Recommendation                                                                                                                                                                                                                                                                                                                                                                                                |                       |
|------------------------------|---------|---------------------------------------------------------------------------------------------------------------------------------------------------------------------------------------------------------------------------------------------------------------------------------------------------------------------------------------------------------------------------------------------------------------|-----------------------|
| <b>Title and abstract</b>    | 1       | (a) Indicate the study's design with a commonly used term in the title or the abstract<br>(b) Provide in the abstract an informative and balanced summary of what was done and what was found                                                                                                                                                                                                                 | ✓<br>✓                |
| <b>Introduction</b>          |         |                                                                                                                                                                                                                                                                                                                                                                                                               |                       |
| Background/rationale         | 2       | Explain the scientific background and rationale for the investigation being reported                                                                                                                                                                                                                                                                                                                          | ✓                     |
| Objectives                   | 3       | State specific objectives, including any prespecified hypotheses                                                                                                                                                                                                                                                                                                                                              | ✓                     |
| <b>Methods</b>               |         |                                                                                                                                                                                                                                                                                                                                                                                                               |                       |
| Study design                 | 4       | Present key elements of study design early in the paper                                                                                                                                                                                                                                                                                                                                                       | ✓                     |
| Setting                      | 5       | Describe the setting, locations, and relevant dates, including periods of recruitment, exposure, follow-up, and data collection                                                                                                                                                                                                                                                                               | ✓                     |
| Participants                 | 6       | (a) Give the eligibility criteria, and the sources and methods of selection of participants. Describe methods of follow-up<br>(b) For matched studies, give matching criteria and number of exposed and unexposed                                                                                                                                                                                             | ✓                     |
| Variables                    | 7       | Clearly define all outcomes, exposures, predictors, potential confounders, and effect modifiers. Give diagnostic criteria, if applicable                                                                                                                                                                                                                                                                      | ✓                     |
| Data sources/<br>measurement | 8*      | For each variable of interest, give sources of data and details of methods of assessment (measurement). Describe comparability of assessment methods if there is more than one group                                                                                                                                                                                                                          | ✓                     |
| Bias                         | 9       | Describe any efforts to address potential sources of bias                                                                                                                                                                                                                                                                                                                                                     | ✓                     |
| Study size                   | 10      | Explain how the study size was arrived at                                                                                                                                                                                                                                                                                                                                                                     | ✓                     |
| Quantitative variables       | 11      | Explain how quantitative variables were handled in the analyses. If applicable, describe which groupings were chosen and why                                                                                                                                                                                                                                                                                  | ✓                     |
| Statistical methods          | 12      | (a) Describe all statistical methods, including those used to control for confounding<br>(b) Describe any methods used to examine subgroups and interactions<br>(c) Explain how missing data were addressed<br>(d) If applicable, explain how loss to follow-up was addressed<br>(e) Describe any sensitivity analyses                                                                                        | ✓<br>✓<br>✓<br>✓<br>✓ |
| <b>Results</b>               |         |                                                                                                                                                                                                                                                                                                                                                                                                               |                       |
| Participants                 | 13*     | (a) Report numbers of individuals at each stage of study—eg numbers potentially eligible, examined for eligibility, confirmed eligible, included in the study, completing follow-up, and analysed<br>(b) Give reasons for non-participation at each stage<br>(c) Consider use of a flow diagram                                                                                                               | ✓                     |
| Descriptive data             | 14*     | (a) Give characteristics of study participants (eg demographic, clinical, social) and information on exposures and potential confounders<br>(b) Indicate number of participants with missing data for each variable of interest<br>(c) Summarise follow-up time (eg, average and total amount)                                                                                                                | ✓<br>✓<br>✓           |
| Outcome data                 | 15*     | Report numbers of outcome events or summary measures over time                                                                                                                                                                                                                                                                                                                                                | ✓                     |
| Main results                 | 16      | (a) Give unadjusted estimates and, if applicable, confounder-adjusted estimates and their precision (eg, 95% confidence interval). Make clear which confounders were adjusted for and why they were included<br>(b) Report category boundaries when continuous variables were categorized<br>(c) If relevant, consider translating estimates of relative risk into absolute risk for a meaningful time period | ✓<br>✓<br>✓           |

|                          |    |                                                                                                                                                                            |   |
|--------------------------|----|----------------------------------------------------------------------------------------------------------------------------------------------------------------------------|---|
| Other analyses           | 17 | Report other analyses done—eg analyses of subgroups and interactions, and sensitivity analyses                                                                             | ✓ |
| <b>Discussion</b>        |    |                                                                                                                                                                            |   |
| Key results              | 18 | Summarise key results with reference to study objectives                                                                                                                   | ✓ |
| Limitations              | 19 | Discuss limitations of the study, taking into account sources of potential bias or imprecision. Discuss both direction and magnitude of any potential bias                 | ✓ |
| Interpretation           | 20 | Give a cautious overall interpretation of results considering objectives, limitations, multiplicity of analyses, results from similar studies, and other relevant evidence | ✓ |
| Generalisability         | 21 | Discuss the generalisability (external validity) of the study results                                                                                                      | ✓ |
| <b>Other information</b> |    |                                                                                                                                                                            |   |
| Funding                  | 22 | Give the source of funding and the role of the funders for the present study and, if applicable, for the original study on which the present article is based              | ✓ |

\*Give information separately for exposed and unexposed groups.

**Note:** An Explanation and Elaboration article discusses each checklist item and gives methodological background and published examples of transparent reporting. The STROBE checklist is best used in conjunction with this article (freely available on the Web sites of PLoS Medicine at <http://www.plosmedicine.org/>, Annals of Internal Medicine at <http://www.annals.org/>, and Epidemiology at <http://www.epidem.com/>). Information on the STROBE Initiative is available at <http://www.strobe-statement.org>.
